# Supplementary material for: The Potential of Integrating Landscape, Geochemical and Economical Indices to Analyze Watershed Ecological Environment
Source: Copernicus journal article supplement (doi:10.5194/hess-2018-408), 2018-08-24
Supplement: Supplementary file [file hess-2018-408-AC2-supplement.pdf]

28 the relationships among the economic indices, heavy metal elements and landscape  
29 pattern indices selected based on correlation analysis; 2) The accumulated economic  
30 indices were significantly correlated with Al, Fe and Ni and should be applied to the  
31 integrated assessment of the watershed ecological environment; 3) Cu, Zn and Pb  
32 were the main elements that showed significant correlations with the forest land; 4)  
33 Some landscape patterns indices such as TA and MESH could be used to the  
34 integrated assessment of the watershed characteristics because of their strong  
35 correlations with the area (or area percentage ) of important landscape types; and 5)  
36 transportation land had a close relationship with per capita GDP. This study implied  
37 that analyzing and modeling the relationships among the economic indices, heavy  
38 metal elements and landscape pattern indices can provide a powerful tool for  
39 characterizing the ecosystem of the river watershed and useful guidelines for the  
40 watershed management and sustainable development.

41 **Keywords:** Watershed; geochemistry; landscape; economic indices; remote sensing;  
42 statistical analysis.

43

## 44 **1. Introduction**

45 The challenge of balancing human needs for water with environmental  
46 sustainability has come to a head in river systems, where various management plans  
47 to conserve and manage the ecosystems have been thrown into a turmoil (Pincock  
48 2010). River ecosystems are mainly influenced by integrated biological, chemical and  
49 physical subsystems, which increases uncertainty in ecological assessments, and  
50 hampers prediction for the ecological environment changes (Wiley et al. 2010). An  
51 in-depth understanding of ecological status and process in river systems is very  
52 important for river conservation and management (Wang and Yang 2014). Stream

53 flow and water quality of a river are affected by both natural and anthropogenic  
54 factors that exist within a watershed, hence the watershed has been recognized as an  
55 appropriate analysis unit for addressing the challenges of water management (Singh et  
56 al. 2014; Deng et al. 2014).

57 There is an urgent demand for sustaining or improving the functions of  
58 watersheds to strengthen their roles in supporting human and meeting ecosystem  
59 needs simultaneously, because watersheds provide economic goods and ecological  
60 services that impact the livelihoods of people (Ingram et al. 2012). Benefiting the  
61 economy, community and environment synchronously would realize the sustainable  
62 development of a watershed. To achieve this goal, a proactive approach that combines  
63 information of economic, social and ecological influence is needed (Randhir and  
64 Shriver 2009; Kantamaneni 2016). Thus, the opportunity for sustaining human and  
65 their river systems can be enhanced by examining how socioeconomic and ecological  
66 processes are integrated at the watershed level (Wolters and Kuenzer 2015; Naiman  
67 1992).

68 Human activity induced disturbances are one of the most important factors that  
69 generate potentially permanent changes to the ecological structure and functions of  
70 watersheds (Wang et al. 2015). The pattern and process of land use (or land cover) is  
71 one typical manifestation of the interaction between human activities and ecological  
72 processes observed in a region (Naiman 1992). Both the extent and depth of  
73 transformation are determined by regional land use patterns and processes (Kabat et al.  
74 2004). Understanding how human depends on landscape functions and products, and  
75 how land use affects ecological and socioeconomic processes can provide a sound  
76 basis for guiding sustainable development of a watershed (Naveh and Lieberman  
77 1984; Zonneveld and Forman 1990).

78 Landscape ecology is a subsidiary discipline of modern ecology, which deals  
79 with the interrelationship between human and landscapes that they live on (Naveh and  
80 Lieberman 1990). Landscape ecology focuses on the interactions between landscape  
81 patterns and ecological processes, and exploring the impacts of land use patterns on  
82 water quality and the spatial scales over which these effects are manifest has become  
83 a significant theme of landscape ecological studies (Turner et al. 2001). Digitized land  
84 use data stored in a Geographical Information System (GIS) are always used to  
85 conduct the analysis of landscape patterns, especially, landscape-level ecosystem  
86 status can be credibly estimated through landscape measurements based on land use  
87 data obtained from remote sensing imagery (Johnson and Patil 2006). However, as the  
88 landscape patterns and ecological processes interact in diverse ways, neither of them  
89 can be ignored to grasp the synthetical dynamics of the environment (Fu and Jones  
90 2013). Although various factors including social, economic, and ecological  
91 considerations that interactively determine landscape patterns are known abstractly,  
92 the quantitative interrelationships among these variables are inadequately recognized.  
93 Furthermore, it is difficult to describe the behaviors of a landscape scaling up from  
94 ecological systems to communities, thus in-depth exploration of the relationships  
95 between landscape patterns and ecological processes is necessary. Because a  
96 landscape presents macroscopic and vast scale characters, which cannot be described  
97 and studied at a microscopic level, the landscape and geochemistry interaction will be  
98 a crucial challenge for studying on the ecological environment assessment in the  
99 coming decades. For example, many recent studies have focused on the influence of  
100 land use patterns in watersheds on water quality and biological communities in  
101 streams (Vrebos et al. 2017; Vaighan et al. 2017; Dzinomwa and Ndagurwa 2017).

102 Geochemistry is the study of the distribution and migration of elements in the

103 environment where we live in, aiming at exploring the distribution of elements in the  
104 earth and interpreting the processes that induce these distribution patterns based on  
105 techniques and principles of chemistry and physics (Wainerdi and Uken 1971).  
106 Hydro-geochemical investigations of surface water can provide information on the  
107 extent and degree of element impacts so as to estimate the level of pollution and  
108 identify principal pollutants in surface water (Quercia and Vidojevic 2012).  
109 Hydro-geochemical speciation methods can offer a more realistic and reliable  
110 measure to identify the degree of migrated water contamination, because they provide  
111 fundamental ideas for better understanding of water features and they have a  
112 sophisticated and meticulous methodology (Moldan 1992; Reuther 1996). However,  
113 the transportation of particulate and dissolved materials in river systems is a  
114 complicated action of different biological, chemical and physical processes occurring  
115 in the watersheds and in the water (Hedges et al. 1986). Hence, available information  
116 on trace elements, including heavy metals in water, is generally inadequate for  
117 regional studies of the ecological environment, and little systematic information on  
118 the spatial relationships between geochemistry and ecology of water is available  
119 (Bowie and Thornton 1985). Thus, a fundamental question concerns whether we can  
120 detect, describe and predict the ecological effects at the geochemical level has been  
121 proposed (Reuther et al. 1996). Then, applying landscape and geochemistry integrated  
122 methods to analyze the ecological environment of a watershed has its theoretical basis  
123 and practical need. Furthermore, socioeconomic and ecological processes need to be  
124 combined to obtain a sustainable development of a watershed at the landscape level,  
125 on which all kinds of analyses utilize land cover types as the basic unit of calculation.

126 First of all, landscape pattern indices, characterizing diversified aspects of  
127 composition, structure and spatial configuration of landscapes, were introduced to

128 quantitatively describe the correlations between spatial patterns and ecological  
129 processes (O'Neill et al. 1988; Remmel and Csillag 2003). One of the most  
130 fascinating features of landscape pattern indices is the simplicity: large amount of data  
131 can be summarized by a single number (or by a limited set of numbers) without a  
132 priori knowledge about the processes and organisms of landscapes (Fortin et al. 2003).  
133 Besides, heavy metals are especially dangerous elements and expose potential  
134 ecological risks to living organisms, on account of their bioaccumulation,  
135 non-degradability and toxicity features (Cai et al. 2015). Heavy metal contamination  
136 in aquatic ecosystems is frequently surveyed by evaluating concentrations in  
137 sediments, biota and water (Rahman et al. 2014), in which variations of the heavy  
138 metal distributions can provide direct information for evaluating the status of  
139 pollution and baseline data to help further develop an efficient strategy on their  
140 controls (Dong et al. 2015; Yeh et al. 1977). Apart from that, economic indices  
141 provide supplementary information on the strength of human activities that give rise  
142 to the production of pollutants (Zhou et al. 2012). For example, the Gross Domestic  
143 Product (GDP) is commonly used as an index for evaluating the economic health and  
144 measuring the living standard of a country. Because the sustainable development of  
145 watersheds requires an integration of hydrologic, ecological and socio-economic  
146 aspects, relationships among these indices or indicators involving landscape pattern,  
147 geochemistry and economy need to be explored to gain an in-depth understanding of  
148 ecological processes and properties in a watershed.

149 The main goals of this study are to: (a) analyze whether and how the  
150 relationships among these indices including landscape pattern, geochemistry and  
151 economy can be found, and (b) explore the potential of analyzing the ecological  
152 environment of a watershed based on a landscape, geochemistry and economy

153 integrated view.

## 154 **2. Materials and Methods**

### 155 **2.1 Study area and sampling**

156 The study area was Yalong River watershed, within Ganzi Tibetan Autonomous  
157 Prefecture, Sichuan Province (Fig. 1). The study area has a total area of 70,366 km<sup>2</sup>,  
158 and 3/5<sup>th</sup> of the Yalong River's full length is distributed in the study area. This region  
159 is located in the upstream section of the Yalong River, which has an important  
160 influence on the water quality and ecological environment. Covering a total of six  
161 counties including Shiqu, Dege, Ganzi, Xinlong, Litang and Yajiang in the  
162 administrative regions of Ganzi, most of the area is mountainous with steep terrain. In  
163 Shiqu County located in the upstream of the basin, the average elevation is 4526.9 m,  
164 the average annual temperature is below -1.6 °C, and the average annual precipitation  
165 is 569.6 mm. However, in Yajiang County located in the downstream of the basin, the  
166 lowest elevation is 2266 m, the average annual temperature is below 11 °C, and the  
167 average annual rainfall is 650 mm. The regional vertical variations of temperature,  
168 precipitation, and vegetation are obvious with the terrain height changes (Shen et al.  
169 2010; 2012).

170 In total, 9 water samples were collected in the study area in 2014 (Fig. 1). The  
171 sampling locations were steadily scattered in the study area from its upstream to  
172 downstream to survey heavy metal concentration characteristics in the water body. A  
173 hand-held global positioning system (GPS) receiver was used to record the exact  
174 locations of the samples for further being imported into ArcGIS. In order to perform  
175 the parametric statistical analysis, 30 observation points were obtained through the  
176 interpolation of 9 water samples. Furthermore, an identify function of ArcGIS was

177 used to acquire the data of landscape pattern and economy indices for statistical  
178 analysis based on the 30 observation points.

## 179 **2.2 Measuring landscape pattern metrics**

### 180 2.2.1 Source of data

181 This study collected and used six multi-spectral bands (band 2-blue, band  
182 3-green, band 4-red, band 5-near infrared, band 6-shortwave channel 1, and band  
183 7-shortwave channel 2) of Landsat 8 images at the spatial resolution of 30 m × 30 m  
184 to classifying land cover types of this study area and obtain land cover maps. A total  
185 of nine cloud-free leave-on and leave-off images dated from May of 2013 to Jan. of  
186 2014 were acquired by downloading from the website supported by USGS (United  
187 States Geological Survey). The radiometric correction and geometric correction of the  
188 images were first conducted and then were clipped according to the boundary of the  
189 study area with ENVI software.

### 190 2.2.2 Land cover classification

191 The establishment of a scientific land cover classification system according to  
192 the regional condition is the primary work needed to obtain the regional landscape  
193 data (Anderson et al. 1976; Li and Ma 2000; Bazi and Melgani 2006). Reference for  
194 the classification system was made to the land use and land cover classification  
195 system for remote sensing data from USGS, the national land classification (For  
196 Transition Period) from Ministry of Land and Resources of P. R. China, as well as the  
197 regional condition of land cover in the Yalong River watershed, and the requirements  
198 for further study. The regional landscape was classified into: forest, river, grassland,  
199 lake, marsh land, bare soil, farm land, human habitation, industrial land, glacial and  
200 snow, and transportation land.



201 Based on the Yalong River watershed land cover classification system, a strict  
202 description for each type of land cover class was obtained. An object-oriented  
203 classification method was applied to extract the land cover information of the study  
204 area. Unlike the traditional classification methods that analyze spectral information of  
205 land cover types, the object-oriented classification method accounts for the spatial  
206 characteristics such as shape and compactness of objects and the relationships  
207 between the objects (Sapozhnikova et al. 2006; Kassouk et al. 2014). This method  
208 first carried out multi-scale image segmentation, that is, classified the pixels into  
209 homogeneous polygons (objects) based on their similarity measured using variances  
210 of pixel values, and shape, smoothness and compactness of objects. The classification  
211 of land cover types was then conducted using decision tree and nearest neighbor. In  
212 order to improve the accuracy of the classification, expert knowledge was applied to  
213 conduct the verification and interpretation.

### 214 2.2.3 Obtaining land cover map

215 Based on the above methods, this study obtained the land cover map of the  
216 Yalong River watershed (Fig. 2). In accordance with the statistics of the classification  
217 results, the areas and proportions of the land cover types of the landscape were  
218 obtained, as shown in the Table 1. The statistics showed that the grassland and forest  
219 were the major land cover types with their area accounting for 89% of the entire  
220 watershed. As shown in Fig. 2, the land cover map of the Yalong River was smooth  
221 and compact due to the segmentation of the objects, without the traditional 'salt and  
222 pepper' phenomenon formed by isolated pixels. Also, the segments contained  
223 information such as shapes, veins, space, and so on, which could be comprehensively  
224 utilized in the process of the classification.

225 In this study, a 30 m spatial resolution image was used in the classification. To

226 ensure the results of the classification accuracy assessment were objective, the  
227 samples used for the accuracy assessment were selected from the 1 m spatial  
228 resolution image provided by Google Earth. A total of 450 samples were obtained by  
229 a simple random sampling method, and these samples were used to calculate the  
230 confusion matrix (Foody 2002). The overall accuracy of the classification was 87.11%,  
231 and the Kappa coefficient was 0.855. Therefore, the high accuracy could fully meet  
232 the demand of this study.

#### 233 2.2.4 Computing landscape pattern metrics

234 Landscape pattern indices are easy to understand due to their ecological  
235 meanings. The indices also contain certain statistic characteristics and are easily used  
236 to analyze and compare the sizes of different patches, and provide important  
237 information of landscape patterns, structures and spatial composition to explain the  
238 functions of landscapes. Landscape pattern indices have been widely used to describe  
239 landscape patterns and changes, and to set up the contact between the patterns and  
240 landscape processes (Turner et al. 2001).

241 Considering the aims of this study and the features of every landscape pattern  
242 index, the follow indices were chosen as the indicators to quantify the ecological  
243 features: Total Area (TA) represents the area of each landscape type; Total Edge (TE)  
244 equals to the sum of the edge lengths of all the segments involved in a corresponding  
245 patch type; Edge Density (ED) means the sum of the edge lengths of all segments  
246 involving a corresponding patch type and divided by the total landscape area;  
247 Contagion (CONTAG) is the negative sum of the proportional abundance of each  
248 patch type and multiplied by the proportion of the adjacencies between the cells of  
249 this patch type and another patch type; Percentage of Like Adjacencies (PLADJ) is  
250 computed as the sum of the diagonal elements of the adjacency matrix and divided by

251 the total number of adjacencies; Interspersion & Juxtaposition Index (IJI) considers  
252 all the patch types present on an image to analyze the amount of patch adjacency or  
253 fragmentation; Patch Cohesion Index (COHESION) is computed from the  
254 information contained in the patch area and the perimeter; Landscape Division Index  
255 (DIVISION) is defined as the probability that two animals placed within different  
256 areas somewhere in the region of the investigation might find each other; Effective  
257 Mesh Size (MESH) simply denotes the size of the patches when the landscape is  
258 divided into S areas, with the same degree of landscape division as obtained for the  
259 observed cumulative area distribution; Splitting Index (SPLIT) is defined as the  
260 number of patches obtained when the total landscape is divided into the patches of  
261 equal size, in such a way that this new configuration leads to the same degree of  
262 landscape division as obtained for the observed cumulative area distribution;  
263 Shannon's Diversity Index (SHDI) is the representative of diversity of a landscape;  
264 Number of Patches (NP) reflects the number of all the landscape patch types; Patch  
265 Density (PD) measures the heterogeneity of the landscape; Largest Patch Index (LPI)  
266 indicates the influencing extent of the largest plaque for the entire landscape;  
267 Landscape Shape Index (LSI) reflects the divergence of the shape of landscape  
268 patches from the ideal circle; and Aggregation Index (AI) means the percentage of  
269 like adjacencies between cells of same patch type (McGarigal et al. 2012).

### 270 **2.3 Measuring chemical concentration**

271 The chemical parameters (Al, Fe, Cr, Ni, Cu, Zn, Cd, Pb) were measured  
272 according to the industry standard (DZ/T0064-93) (Figs. 3-6), conducted by Ministry  
273 of Geology and Mineral Resources of P. R. China. All these elements were measured  
274 with a method of ICP-MS (Inductively Coupled Plasma Mass Spectrometry).

## 275 **2.4 Measuring economic variables**

276 The GDP and Population are commonly used as the indicators for measuring the  
277 economic health and living standard in a country. In addition to these two indices,  
278 other indices are also used to observe the effects of human disturbances on water  
279 quality. Data pertaining to spatial distribution of economic indices (Population,  
280 Accumulated Population, Population Density, Accumulated Population Density, GDP,  
281 Accumulated GDP, Per Capita GDP, Accumulated Per Capita GDP, Gross Output  
282 Value of Agriculture, and Accumulated Gross Output Value of Agriculture) were  
283 generated through the spatial analysis methods, to identify the relationships between  
284 economic indicators and other indices. As examples, Fig.7 and Fig. 8 respectively  
285 showed the spatial distributions of GDP and its accumulation values. The accumulated  
286 indicators were calculated by summing the local values of the corresponding indicator  
287 along the river from the upper reach and implied the impacts of accumulated values.

## 288 **2.5 Statistical analysis**

289 Due to a large number of variables of interest (VIs), we first clustered the VIs in  
290 terms of their Pearson correlation coefficients (Pearson 1895), and then, the linear  
291 regression was performed on those highly correlated VI clusters. In this study, an  
292 agglomerative hierarchical clustering analysis (HCA) was used to assess the strength  
293 of linear correlation. HCA builds up the clustering hierarchy from bottom to top, i.e.,  
294 each VI starts with being its own cluster, and the pairs of clusters are then merged as  
295 one moves up. The merge happens if the dissimilarity of a pair of clusters is the local  
296 minimum. HCA generates a graphical representation – a dendrogram (or tree) – where  
297 the VIs are hierarchically grouped together in the hierarchical fashion (e.g., Fig. 10).  
298 The height of the dendrogram (tree) implicates the level of dissimilarity, and the

299 process of cluster detection is referred to branch pruning at a desired height  
300 (Langfelder et al. 2008). For clustering the strength of linear correlations on VIs, the  
301 dissimilarity matrix used in the 1<sup>st</sup> HCA was the determination of Pearson correlation  
302 coefficient,  $r^2$ . The tree was cut at the dissimilarity level of 0.1 ( $r^2=0.9$ ), where the  
303 corresponding correlation coefficient would then be larger than 0.949 or smaller than  
304 -0.949 in order to maintain the statistical significance.

305 In addition, stepwise regression was also used to identify the interrelationships  
306 among the landscape pattern, heavy metal elements and economic indices, and to  
307 determine whether and how the relationships among them could be presented by  
308 specific representative factors. The optimal models were assessed based on the  
309 coefficient of determination ( $R^2$ ) and statistical significance (Sig.).

### 310 **3. Results and discussion**

#### 311 **3.1 Distribution characteristics of elements in water samples**

312 Figures 3-6 show the values of water quality parameters for the upper, middle,  
313 and lower main channels. The contents of Cr, Ni, Cu, Zn, Cd, and Pb were all below  
314 the guideline values for Drinking-water Quality defined by World Health  
315 Organization and the Environmental Quality Standards for Surface Water by the  
316 Ministry of Environmental Protection of P. R. China. However, the contents of Al and  
317 Fe were significantly higher than the guideline values. Spatially, the contents of the  
318 elements in the river water generally increased from the upper to downstream. The  
319 average values of Al, Fe, Ni, Zn and Pb continuously increased as the water flew to  
320 the downstream. The spatial pattern is somewhat alike to that gained in the study of  
321 the Fuji River in Japan, in which high-pollution regions were mainly located in the  
322 downstream (Shrestha and Kazama 2007). However, the spatial distributions of Cr,

323 Cu, and Cd values fluctuated from the upstream to the downstream.

### 324 **3.2 Analysis of landscape pattern**

325 Based on the land cover classification results, the landscape pattern indices of the  
326 study area were obtained using Fragstats 4.2 software, which are shown in Table 2.  
327 The results indicated that the values of the indices were diversified from the upstream  
328 to the downstream except PLADJ, AI, COHESION and MESH. Among the indices,  
329 TA, LPI, CONTAG, PLADJ, COHESION, MESH and AI showed the highest values,  
330 while PD, ED, LSI, DIVISION, SPLIT and SHDI had the lowest values in Shiqu  
331 county located in the upstream, implying that a health ecological condition was  
332 observed in the upstream. In Xinlong county located in the midstream, there were  
333 highest values for NP, PD, TE, ED, LSI, DIVISION, SPLIT and SHDI, and lowest  
334 values for LPI, PLADJ, IJI and AI, demonstrating that the ecological environment  
335 was disturbed and landscape fragmentation was observed. The landscape indices LPI,  
336 PD and DIVISION showed a turning point in the midstream Xinlong County. In  
337 Litang county that had a smallest area, the values of TA, NP, TE, CONTAG,  
338 COHESION and MESH were lowest, while the value of IJI was highest, indicating  
339 that the ecological environment needed to be paid attention to.

340 The AI in all the counties had the values of above 91.5, indicating that the  
341 landscape of the study area showed a high degree of aggregation, that is, the  
342 ecological environment was still in a good condition. The differences of LPI between  
343 the counties were very obvious. All the high values were distributed in the upstream,  
344 which meant the large patches dominated the landscape of the region. LSI had the  
345 higher values in the downstream, which indicated that the landscape structure was  
346 complicated in this region. In addition, by combining the values of CONTAG, PLADJ,  
347 COHESION, DIVISION, MESH, SPLIT and SHDI indices in the table, it was found

348 that the upstream had a better but weaker ecological condition than the downstream.

### 349 **3.3 Correlations among landscape pattern, geochemistry and economy indices**

#### 350 3.3.1 Clustering correlation on VIs

351 To construct the HCA, a dissimilarity matrix requires to be defined. For the  
352 assessment of linear correlation among all the VIs, the dissimilarity was defined as  
353  $1-r^2$ . The linear dissimilarity matrix was exhibited as a color map in order to visualize  
354 the correlation strength (Fig. 9). On the map, the cell color indicates the correlation  
355 strength between the pairs of VIs, and as it shifts from blue to red, the linear  
356 correlation gets stronger. The HCA for linear correlation resulted a dendrogram shown  
357 in Fig. 10, where the red dash line was the threshold at which the tree was pruned. As  
358 mentioned before, the threshold was 0.1 in order to maintain the statistical  
359 significance. Therefore, only the clusters below 0.1 (red dash line in Fig. 10) were  
360 proceeded to further investigation (Table 3).

#### 361 3.3.2 Regression models of heavy metal elements, landscape pattern and economic 362 indices

363 Table 3 shows that the members of cluster 1 are chemical elements, the members  
364 of cluster 3 and cluster 4 are landscape pattern indices, the members of group 6, 7 and  
365 8 are landscape area statistical indicators, and the members of group 10 are all  
366 economic indicators. It is reasonable and easy to understand that the same categories  
367 of indicators are clustered in the same group. However, we are concerned about  
368 whether there are correlations among different categories of indicators and what  
369 quantitative relationships exist between them. Therefore, we explored the regression  
370 models between different categories of indices in group 2, group 5 and group 9,  
371 respectively. Furthermore, the relationships between geochemical elements and other

372 indicators are what we want to see. Therefore, the regression analysis of each  
373 chemical element in group 1 and all other types of indicators was also separately  
374 conducted.

375 The stepwise regression greatly reduced the impacts of multi-collinearity in this  
376 study. All the obtained models were significant at the significant level of 0.05 (Table  
377 4). There was only one variable accumulated per capita GDP in the models for the Al  
378 element. The variables accumulated per capita GDP and human habitation percentage  
379 were involved in the model for the Fe and Ni element. It was found that as the  
380 indicators of the economic health in a country and the references for quantifying the  
381 intensity of human activities, the economic indices had significantly linear  
382 relationships with the Al, Fe and Ni elements at the significant level of 0.05.  
383 Furthermore, the accumulated economic indices were involved because of the  
384 assembling characteristics of elements from the upstream to the downstream (Cortecci  
385 et al. 2009; Li and Zhang 2010; Taylor et al. 2012; Yang et al. 2014; Bu et al. 2016).

386 The model for the Cu selected the variable forest percentage because of its  
387 significant correlation with the element. Two variables forest percentage and  
388 transportation land percentage were highly correlated with the Zn element and  
389 involved in its prediction model. Cu and Zn are crucial elements for both animals and  
390 plants, but they have also been identified as possible specific pollutants in many  
391 countries (Comber et al. 2008; Jensen et al. 2016). Many studies have proved that the  
392 distribution patterns of Cu and Zn have significant correlations with certain landscape  
393 patterns and processes (Stone and Droppo 1996; Lindström 2001; Morse et al. 2016).  
394 This was supported by the results of this study.

395 The variables forest and forest percentage were involved in the model for the Pb  
396 element. Forest had a significantly negative correlation with Pb, which is intelligible



397 because forest land has important ecological value and Pb is greatly influenced by  
398 human activities. Moreover, the landscape pattern variable TA were sensitive to the  
399 land cover area due to the calculation principle and three variables marsh land, marsh  
400 land percentage and river that reflect the distribution of landscape area were included  
401 in the model. The variables transportation land were involved in the model for the  
402 landscape pattern variable MESH. The MESH was used to measure the spatial  
403 distribution and degree of landscape fragmentation in former study because it has  
404 been proposed as a good single indicator of land division by roads (Jaeger 2000, Li et  
405 al. 2010).

406 A linear relationship between transportation land and per capita GDP could be  
407 observed because of both of them involving in the model. Transportation land was  
408 highly correlated with the economic index because the traffic condition was one key  
409 factor for supporting the local human activities (Gentile and Noekel 2016; Alam et al.  
410 2016). However, no significant correlations were observed between heavy metal  
411 elements and landscape pattern indices, which indicates the limitation of analyzing the  
412 relationships between the heavy metal elements and the landscape pattern indices to  
413 explore the ecological status and process.

#### 414 **4. Conclusions**

415 In this study, the relationships between the economic indices, heavy metal  
416 elements and landscape pattern indices were explored and used to analyze and  
417 characterize the ecosystem and environment of Yalong River watershed within Ganzi  
418 Tibetan Autonomous Prefecture, Sichuan Province, using water samples collected in  
419 the field and an image derived land cover classification. In summary, this study led to  
420 following findings: 1) The ecological status and process of the watershed could be  
421 explained by analyzing the relationships among the economic indices, heavy metal

422 elements and landscape pattern indices selected based on correlation analysis; 2) The  
423 accumulated economic indices were significantly correlated with Al, Fe and Ni and  
424 should be applied to the integrated assessment of the watershed ecological  
425 environment. This conforms to the assembling characteristics of the elements in the  
426 river from the upstream to the downstream; 3) Cu, Zn and Pb were the main elements  
427 that showed significant correlations with the forest land and this was also supported  
428 by previous studies; 4) Some landscape patterns indices such as TA and MESH could  
429 be used to the integrated assessment of the watershed ecological environment because  
430 of their strong correlations with the area (or area percentage ) of important landscape  
431 types, i.e., river, marsh and transportation land; however, some limitations of using  
432 the landscape pattern indices were also observed, indicating that the selection of the  
433 landscape pattern indices was essential; and 5) transportation land had a close  
434 relationship with per capita GDP because transportation and mobility were vital  
435 constituents of socio-economic development in any country. The conclusions will play  
436 a fundamental role in establishing the synthetic models for management of  
437 watersheds.

438         However, it was found that the connection between the economic development  
439 and the landscape structure was unable to be established with a simple index analysis.  
440 Moreover, analyzing the relationships between the heavy metal elements and the  
441 landscape pattern indices to explore the ecological status and process had their  
442 limitations. The ecological problems of a watershed could not be revealed through  
443 simply analyzing one kind of indices and the sustainable development of the  
444 watershed requires an integrated evaluation of hydrologic, ecological and  
445 socio-economic factors. A more complicated and comprehensive approach is needed  
446 to get an in-depth understanding of the ecological processes and properties of the

447 watershed. Although, at the present, an increasing number of theories and methods for  
448 integrated watershed management have been developed, the exploration of  
449 quantitative relationships among the driving factors still requires a significant effort  
450 and multivariate statistical methods based on sufficient sampling data in the future  
451 work could be an alternative.

## 452 **Acknowledgments**

453 This study was supported by the National Natural Science Funds of China (grant  
454 no. 41871357), the Sichuan Basic Science and Technology Project (grant no.  
455 18YYJC1148), the Branch of Mountain Sciences, Kathmandu Center for Research  
456 and Education, CAS-TU, Chengdu, China (grant no. Y8R3310310), the Hundred  
457 Young Talents Program of the Institute of Mountain Hazards and Environment (grant  
458 no. SDSQB-2015-02), the “One-Three-Five” Project of Chinese Academy of Sciences  
459 (grant no. SDS-135-1708) and the Science and Technology Service Network Program  
460 of the Chinese Academy of Sciences (grant no. Y8R2020022).

## 461 **References**

- 462 [1] Alam, M., Ferreira, J. and Fonseca, J.: Intelligent transportation systems.  
463 Springer International Publishing, Switzerland, 2016.
- 464 [2] Anderson, J. R., Hardy, E. E. and Roach J. T.: A land cover classification system  
465 for use and land cover classification system for use with remote sensor data. USGS  
466 Professional Paper, America, 964, 1976.
- 467 [3] Bazi, Y. and Melgani, F. Toward an optimal SVM classification system for hyper  
468 system remote sensing images, *Geosci. Remote. Sens.*, 44(11), 3374–3385, 2006.
- 469 [4] Bowie, S. H. U. and Thornton, I.: Environmental geochemistry and health. D.  
470 Reidel Publishing Company, Dordrecht, 1985.

- 471 [5] Bu, H. M., Song, X. F. and Guo, F.: Dissolved trace elements in a  
472 nitrogen-polluted river near to the Liaodong Bay in northeast China, *Mar. Pollut.*  
473 *Bull.*, 114(1), 547–554, 2016.
- 474 [6] Cai, Y., Zhang, W. G., Zhou, M. C., Jiang, H., Xu, D. L., An, S. Q. and Leng, X.:  
475 Comprehensive assessment of heavy metal contamination in surface sediments from  
476 the inflow rivers of Taihu Basin, *Clean Soil Air Water*, 43(12), 1582–1591, 2015.
- 477 [7] Comber, S. D. W., Merrington, G., Sturdy, L., Delbeke, K. and van Assche, F.:  
478 Copper and zinc water quality standards under the EU water framework directive:  
479 the use of a tiered approach to estimate the levels of failure, *Sci. Total Environ.*  
480 403(1-3), 12–22, 2008.
- 481 [8] Cortecchi, G., Boschetti, T., Dinelli, E., Cidu, R., Podda, F. and Doveri, M.:  
482 Geochemistry of trace elements in surface waters of the Arno River Basin, Northern  
483 Tuscany, Italy, *Appl. Geochem.* 24, 1005–1022, 2009.
- 484 [9] Deng, X. Z., Wang, Y., Wu, F., Zhang, T. and Li, Z. H.: Integrated river basin  
485 management: practice guideline for the IO table compilation and CGE modeling.  
486 Springer Berlin, Heidelberg, 2014.
- 487 [10] Dong, D. M., Liu, X. X., Guo, Z. Y., Hua, X. Y., Su, Y. L. and Liang, D. P.:  
488 Seasonal and spatial variations of heavy metal pollution in water and sediments of  
489 China's Tiaozi River, *Pol. J. Environ. Stud.*, 24(6), 2371–2379, 2015.
- 490 [11] Dzinomwa, T. and Ndagurwa, H. G. T.: Effect of land use on water quality and  
491 phytoplankton community in the tropical Khami River in semi-arid southwest  
492 Zimbabwe, *Afr. J. Aquat. Sci.*, 42(1), 83–89, 2017.
- 493 [12] Foody, G. M.: Status of land cover classification accuracy assessment, *Remote*  
494 *Sens. Environ.*, 80(1), 185–201, 2002.
- 495 [13] Fortin, M. J., Boots, B., Csillag, F. and Rimmel, T. K.: On the role of spatial

496 stochastic models in understanding landscape indices in ecology, *OIKOS*, 102(1),  
497 203–212, 2003.

498 [14] Fu, B. J. and Jones, K.B. *Landscape ecology for sustainable environment and*  
499 *culture*, Springer Science + Business Media, Dordrecht, 2013.

500 [15] Gentile, G. and Noekel, K.: *Modelling public transport passenger flows in the*  
501 *era of intelligent transport systems*, Springer International Publishing, Switzerland,  
502 2016.

503 [16] Hedges, J. I., Clark, W. A., Quay, P. D., Richey, J. E., Devol, A. and Santos, U.:  
504 *Composition and fluxes of particulates organic material in the Amazon River.*  
505 *Limnol. Oceanog.*, 31(4), 717–738, 1986.

506 [17] Ingram, J. C., DeClerck, F., Rio, CRD.: *Integrating ecology and poverty*  
507 *reduction: ecological dimensions*, Springer, New York, 2012.

508 [18] Jensen, J., Larsen, M. M. and Bak, J.: *National monitoring study in Denmark*  
509 *finds increased and critical levels of copper and zinc in arable soils fertilized with*  
510 *pig slurry*, *Environ. Pollut.*, 214, 334–340, 2016.

511 [19] Johnson, G. D. and Patil, G. P.: *Landscape pattern analysis for assessing*  
512 *ecosystem condition*, Springer Science + Business Media, New York, 2006.

513 [20] Kabat, P., Claussen, M., Dirmeyer, P. A., Gash, J. H. C., Guenni, L. B. D.,  
514 Meybeck, M. and Pielke, S. R. A.: *Vegetation, water, humans and the climate*,  
515 Springer Berlin, Heidelberg, 2004.

516 [21] Kantamaneni, K.: *Counting the cost of coastal vulnerability*, *Ocean Coastal*  
517 *Manage.*, 132, 155–169, 2016).

518 [22] Kassouk, Z., Thouret, J. C., Gupta, A., Solikhin, A. and Liew, S.C.:  
519 *Object-oriented classification of a high-spatial resolution Spot5 image for mapping*  
520 *geology and landforms of active volcanoes: Semeru case study, Indonesia,*

521 Geomorphol., 221(11), 18–33, 2014.

522 [23] Langfelder, P., Zhang, B. and Horvath, S.: Defining clusters from a hierarchical  
523 cluster tree: the Dynamic Tree Cut package for R. *Bioinformatics*, 24(5), 719-720,  
524 2007.

525 [24] Li, S. G. and Ma, R.: The exploration of land use classification system, *China*  
526 *Land Sci.*, 14(1), 39–40, 2000.

527 [25] Li, S. Y. and Zhang, Q. F.: Spatial characterization of dissolved trace elements  
528 and heavy metals in the Upper Han River (China) using multivariate statistical  
529 techniques, *J. Hazard Mater*, 176, 579–588, 2010.

530 [26] Li, T., Shilling, F., Thorne, J., Li, F., Schott, H., Boynton, R., Berry, A. M.:  
531 *Fragmentation of China's landscape by roads and urban areas, Landscape Ecol*, 25,  
532 *839–853, 2010.*

533 [27] Lindström, M.: Urban land use influences on heavy metal fluxes and surface  
534 sediment concentrations of small lakes, *Water Air Soil Pollut.*, 126(3-4), 363–383,  
535 2001.

536 [28] McGarigal, K., Cushman, S. A. and Ene, E.: FRAGSTATS v4: Spatial pattern  
537 analysis program for categorical and continuous maps, Computer software program  
538 produced by the authors at the University of Massachusetts, Amherst, 2012.

539 [29] Moldan, B.: *Geochemistry and the environment*, Springer-Verlag Berlin,  
540 Heidelberg, 1992.

541 [30] Morse, N., Walter, M. T., Osmond, D. and Hunt, W.: Roadside soils show low  
542 plant available zinc and copper concentrations, *Environ. Pollut.*, 209, 30–37, 2016.

543 [31] Naiman, R. J.: *Watershed management*, Springer-Verlag, New York, 1992.

544 [32] Naveh, Z. and Lieberman, A. S.: *Landscape ecology*, Springer-Verlag, New  
545 York, 1984.

- 546 [33] Naveh, Z. and Lieberman, A. S.: Landscape ecology theory and application,  
547 Springer Science + Business Media, New York, 1990.
- 548 [34] O'Neill, R. V., Krummel, J. R. and Gardner, R. H.: Indices of landscape pattern,  
549 Landscape Ecol., 1(3), 153–162, 1988.
- 550 [35] Pearson, K.: Notes on regression and inheritance in the case of two parents,  
551 Proc. R. Soc. London ,58, 240–242, 1895.
- 552 [36] Pincock, S.: River chief resigns, Nature, 468(7325), 744, 2010.
- 553 [37] Quercia, F. F. and Vidojevic, D.: Clean soil and safe water, Springer,  
554 Netherlands, 2012.
- 555 [38] Rahman, M. S., Saha, N., Molla, A. H. and AlReza, S. M.: Assessment of  
556 anthropogenic influence on heavy metals contamination in the aquatic ecosystem  
557 components: water, sediment, and fish, Soil Sediment Contam. 23(23), 353–373,  
558 2014.
- 559 [39] Randhir, T. O. and Shriver, D. M.: Multiattribute optimization of restoration  
560 options: designing incentives for watershed management, Water Resour. Res., 45(3),  
561 W03405, 2009.
- 562 [40] Rimmel, T. K. and Csillag, F.: When are two landscape pattern indices  
563 significantly different? J. Geograph. Syst., 5(4), 331–351, 2003.
- 564 [41] Reuther, R.: Geochemical approaches to environmental engineering of metals,  
565 Springer-Verlag Berlin, Heidelberg, 1996.
- 566 [42] Sapozhnikova, E. P., Bogdan, M., Speiser, B. and Rosenstiel, W.: EChem++ –  
567 An object-oriented problem solving environment for electrochemistry. 3.  
568 classification of voltammetric signals by the fuzzy ARTMAP neural network with  
569 respect to reaction mechanisms, J. Electroanal. Chem., 588(1), 15–26, 2006.
- 570 [43] Shen, Z. Y., Hong, Q. and Hong, Y.: Parameter uncertainty analysis of

571 non-point source pollution from different land use types, *Sci. Total Environ.*, 408(8),  
572 1971–1978, 2010.

573 [44] Shen, Z. Y., Hong, Q. and Hong, Y.: An overview of research on agricultural  
574 non-point source pollution modeling in China, *Sep. Purif. Technol.*, 84(2), 104–111,  
575 2012.

576 [45] Shrestha, S. and Kazama, F.: Assessment of surface water quality using  
577 multivariate statistical techniques: a case study of the Fuji River Basin, Japan,  
578 *Environ. Modell. Software*, 22(4), 464–475, 2007.

579 [46] Singh, M., Singh, R. B. and Hassan, M. I.: Landscape ecology and water  
580 management, *Proceedings of IGU Rohtak Conference*, Springer, Japan, 2014.

581 [47] Stone, M. and Droppo, I. G.: Distribution of lead, copper and zinc in  
582 size-fractionated river bed sediment in two agricultural catchments of southern  
583 Ontario, Canada, *Environ. Pollut.*, 93(3), 353–362, 1996.

584 [48] Taylor, H. E., Antweiler, R. C., Roth, D. A., Alpers, C. N. and Dileanis, P.:  
585 Selected trace elements in the Sacramento River, California: occurrence and  
586 distribution, *Arch. Environ. Contam. Toxicol.*, 62, 557–569, 2012.

587 [49] Turner, M. G., Gardner, R. H. and O'Neill, R. V.: *Landscape ecology in theory  
588 and practice: pattern and process*, Springer-Verlag, New York, 2001.

589 [50] Vaighan, A. A., Talebbeydokhti, N. and Bavani, A.M.: Assessing the impacts of  
590 climate and land use change on streamflow, water quality and suspended sediment  
591 in the Kor River Basin, southwest of Iran, *Environ. Earth. Sci.*, 76(15), 543, 2017.

592 [51] Vrebos, D., Beauchard, O. and Meire, P.: The impact of land use and spatial  
593 mediated processes on the water quality in a river system, *Sci. Total Environ.*, 601,  
594 365–373, 2017.

595 [52] Wainerdi, R. E. and Uken, E. A.: *Modern methods of geochemical analysis*,



596 Plenum Press, New York, 1971.

597 [53] Wang, L. K. and Yang, C. T.: Handbook of environmental engineering: modern  
598 water resources engineering, Springer Science + Business Media, New York, 2014.

599 [54] Wang, Z. Y., Lee, J. H. W. and Melching, C. S.: River dynamics and integrated  
600 river management, Springer Berlin, Heidelberg, 2015.

601 [55] Wiley, M.J., Hyndman, D. W., Pijanowski, B. C., Kendall, A. D., Riseng, C.,  
602 Rutherford, E. S. and Cheng, S. T.: A multi-modeling approach to evaluating climate  
603 and land use change impacts in a great lakes river basin, *Hydrobiologia.*, 657(1),  
604 243–262, 2010.

605 [56] Wolters, M. L. and Kuenzer, C.: Vulnerability assessments of coastal river  
606 deltas-categorization and review, *J. coastal Conserv.* 19(3), 345–368, 2015.

607 [57] Yang, Z. F., Xia, X. Q., Wang, Y. P., Ji, J. F., Wang, D. C., Hou, Q. Y. and Yu, T.:  
608 Dissolved and particulate partitioning of trace elements and their spatial–temporal  
609 distribution in the Changjiang River, *J. Geochem. Explor.*, 145, 114–123, 2014.

610 [58] Yeh, S. J., Chen, P. Y. and Tanaka, S. Heavy metals in river water from  
611 industrial cities in Taiwan, *J. Chinese Chem. Soc.*, 24(4), 205–208, 1977.

612 [59] Zhou, T., Wu, J. G. and Peng, S. L.: Assessing the effects of landscape pattern  
613 on river water quality at multiple scales: a case study of the Dongjiang River  
614 Watershed, China, *Ecol. Indic.*, 23(4), 166–175, 2012.

615 [60] Zonneveld, S. and Forman, R. T. T.: Changing landscapes: an ecological  
616 perspective, Springer-Verlag, New York, 1990.

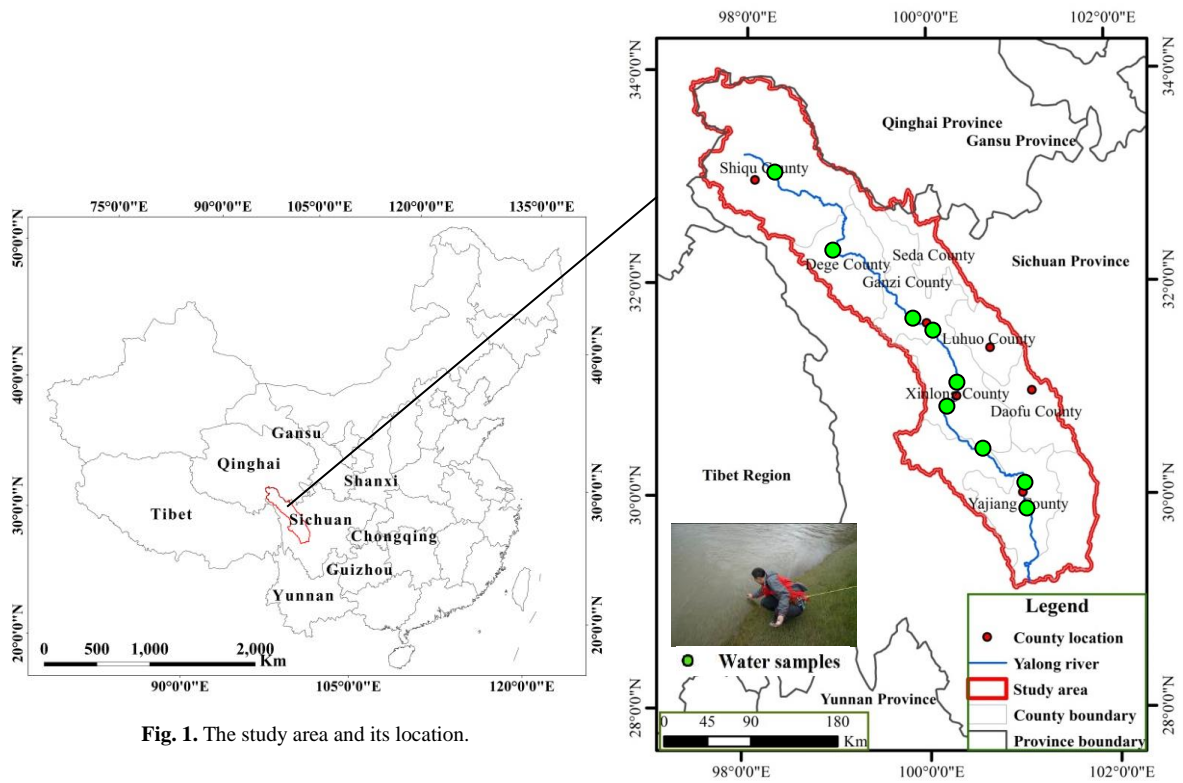

Fig. 1. The study area and its location.

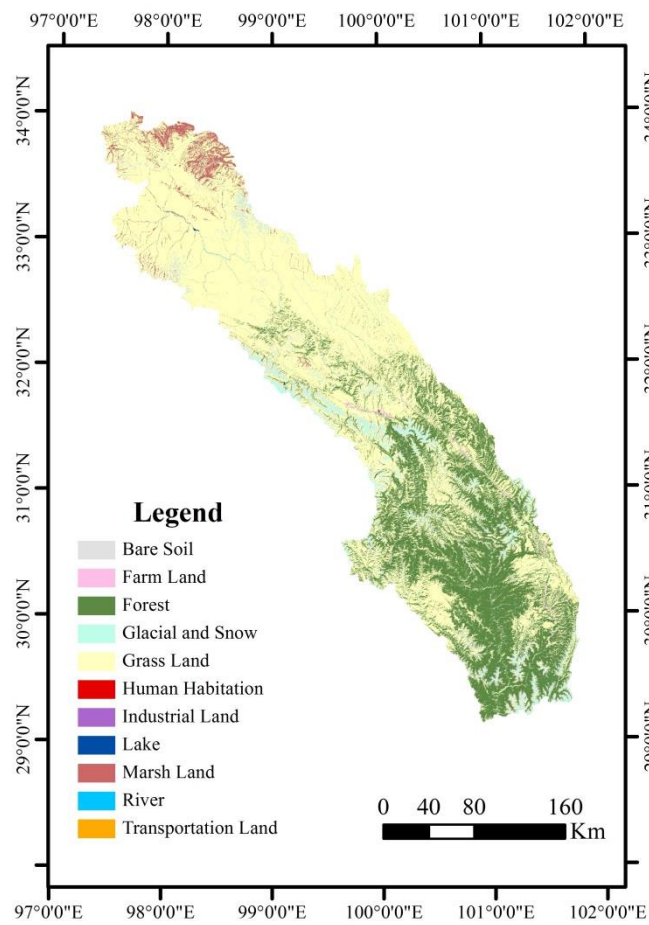

Fig. 2. Land cover classification map.

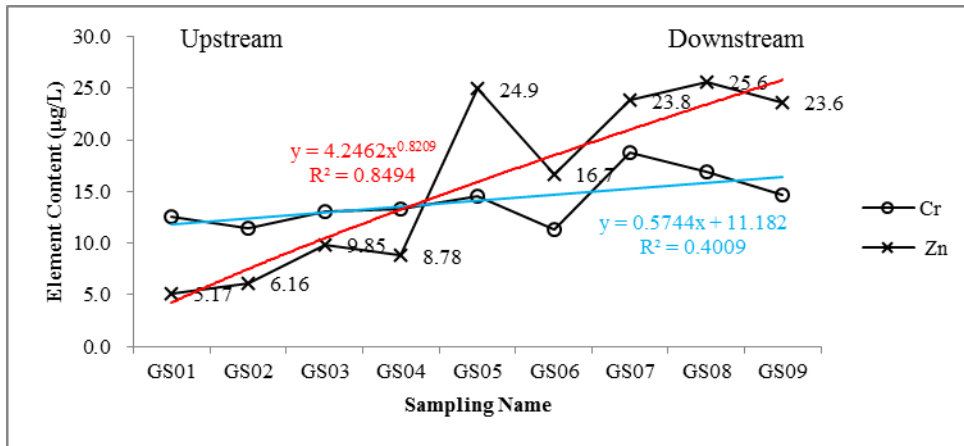

**Fig. 3.** The values of Cr and Zn elements from water samples along the river from upstream to downstream ( $\mu\text{g/L}$ )

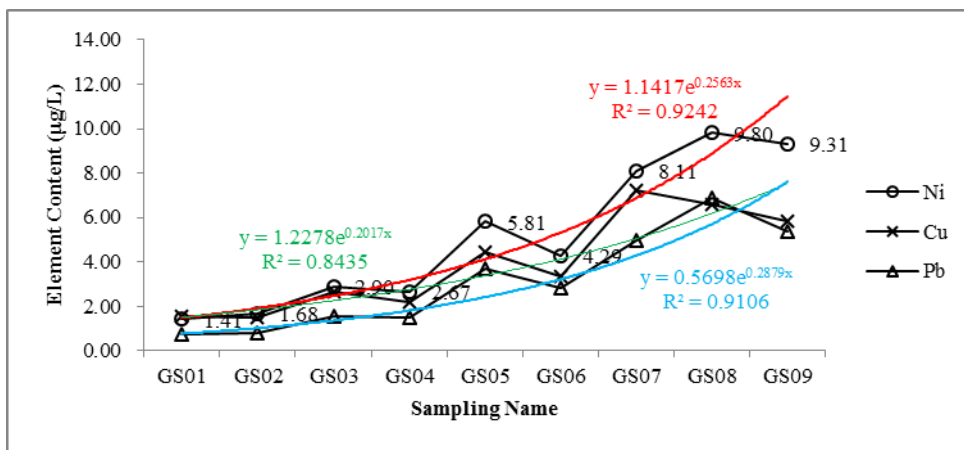

**Fig. 4.** The values of Ni, Cu and Pb elements from water samples along the river from upstream to downstream ( $\mu\text{g/L}$ )

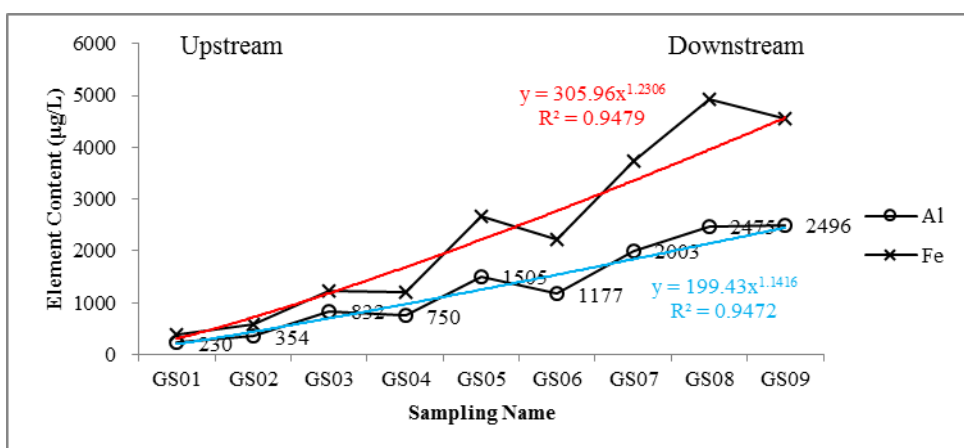

**Fig. 5.** The values of Al and Fe elements from water samples along the river from upstream to downstream ( $\mu\text{g/L}$ )

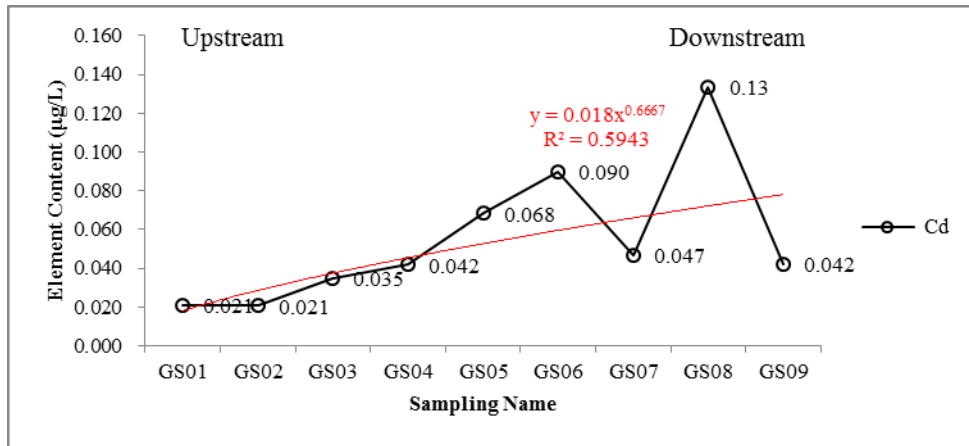

Fig. 6. The values of Cd element from water samples along the river from upstream to downstream (µg/L)

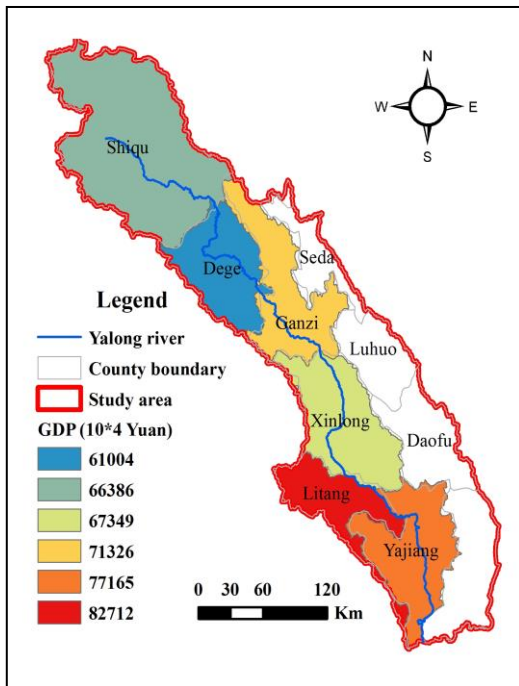

Fig. 7. Map showing the GDP of the counties that the river goes through

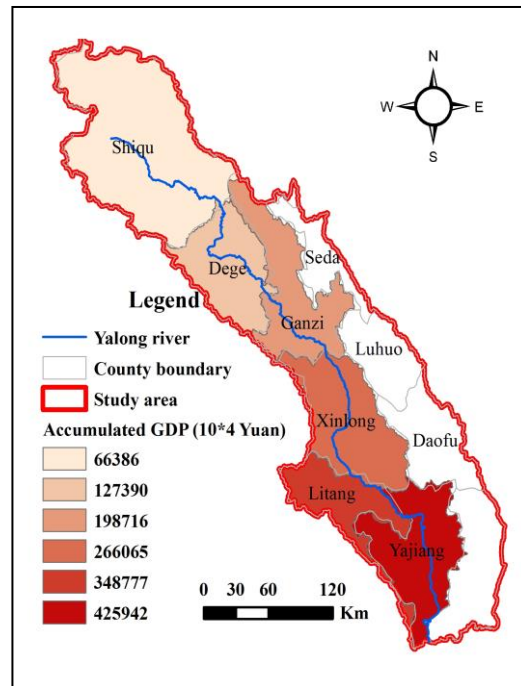

Fig. 8. Map showing the accumulated GDP of the counties that the river goes through

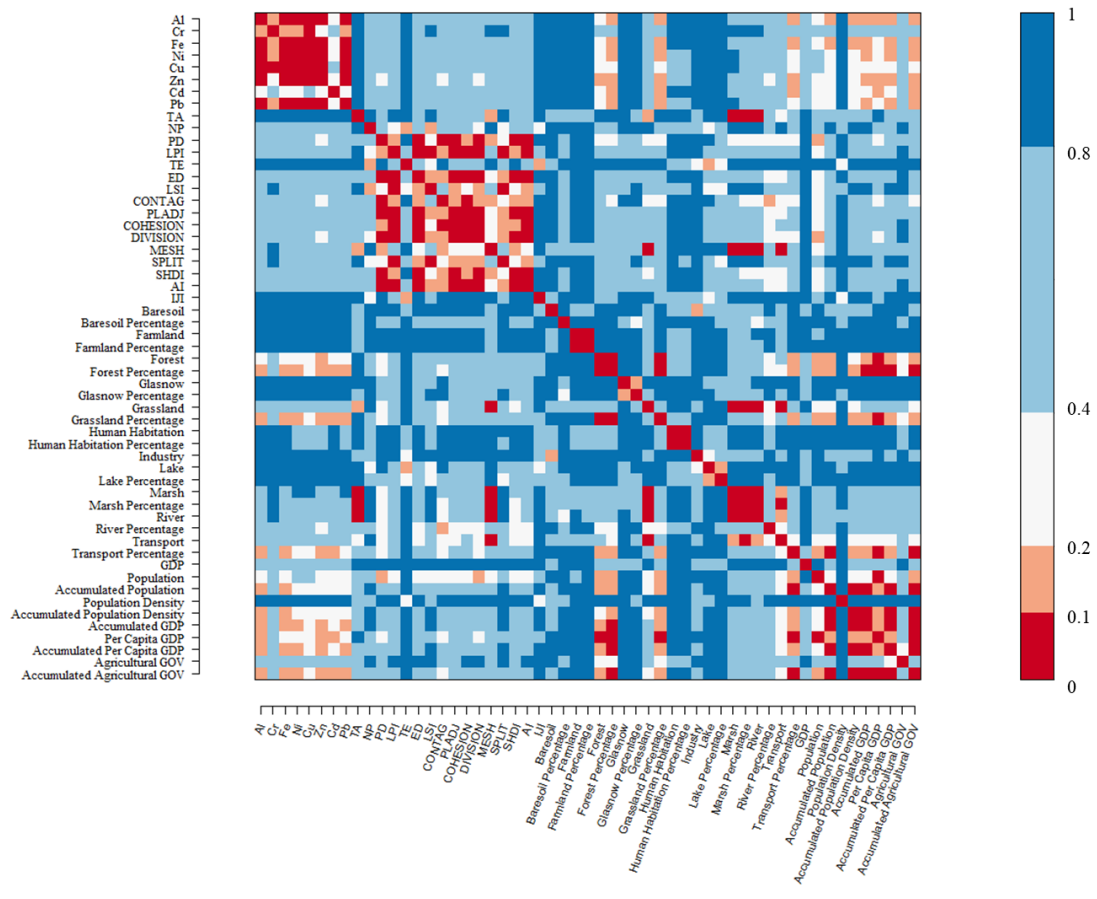

Fig. 9. The color map for visualizing the dissimilarity matrix measured by  $1-r^2$ .

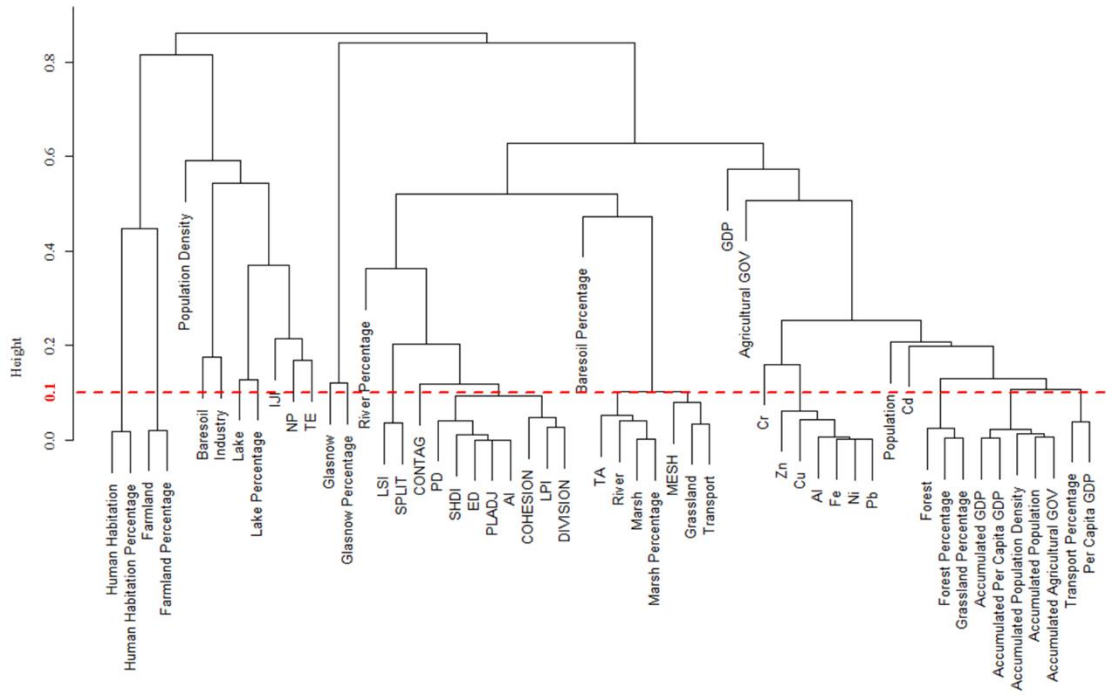

**Fig. 10.** HCA dendrogram based on the measured by  $1-r^2$ .

**Table 1.** Area and proportion of each land cover type.

| Land cover classes  | Shiqu                  |                | Dege                   |                | Ganzi                  |                |
|---------------------|------------------------|----------------|------------------------|----------------|------------------------|----------------|
|                     | Area(km <sup>2</sup> ) | Proportion (%) | Area(km <sup>2</sup> ) | Proportion (%) | Area(km <sup>2</sup> ) | Proportion (%) |
| Bare Soil           | 561.77                 | 3.12%          | 398.24                 | 6.18%          | 309.39                 | 4.22%          |
| Farm Land           | 4.81                   | 0.03%          | 22.86                  | 0.35%          | 80.18                  | 1.09%          |
| Forest              | 1.10                   | 0.01%          | 644.45                 | 10.00%         | 774.57                 | 10.56%         |
| Glacial and Snow    | 131.10                 | 0.73%          | 286.03                 | 4.44%          | 285.20                 | 3.89%          |
| Grassland           | 15428.98               | 85.68%         | 4997.31                | 77.57%         | 5793.54                | 78.96%         |
| Human Habitation    | 1.45                   | 0.01%          | 2.65                   | 0.04%          | 7.66                   | 0.10%          |
| Industrial Land     | 0.45                   | 0.00%          | 0.23                   | 0.00%          | 0.19                   | 0.00%          |
| Lake                | 9.48                   | 0.05%          | 5.18                   | 0.08%          | 0.19                   | 0.00%          |
| Marsh Land          | 1693.74                | 9.41%          | 36.08                  | 0.56%          | 23.84                  | 0.32%          |
| River               | 143.26                 | 0.80%          | 38.94                  | 0.60%          | 55.63                  | 0.76%          |
| Transportation Land | 32.26                  | 0.18%          | 10.68                  | 0.17%          | 6.86                   | 0.09%          |

**Table 1 (Continuous).** Area and proportion of each land cover type

| Land cover classes  | Xinlong                |                | Litang                 |                | Yajiang                |               |
|---------------------|------------------------|----------------|------------------------|----------------|------------------------|---------------|
|                     | Area(km <sup>2</sup> ) | Proportion (%) | Area(km <sup>2</sup> ) | Proportion (%) | Area(km <sup>2</sup> ) | Proportion(%) |
| Bare Soil           | 451.32                 | 5.64%          | 191.70                 | 4.11%          | 363.59                 | 4.80%         |
| Farm Land           | 38.69                  | 0.48%          | 15.72                  | 0.34%          | 38.01                  | 0.50%         |
| Forest              | 3540.41                | 44.22%         | 2274.36                | 48.78%         | 4868.50                | 64.29%        |
| Glacial and Snow    | 330.76                 | 4.13%          | 104.38                 | 2.24%          | 81.37                  | 1.07%         |
| Grassland           | 3581.73                | 44.74%         | 2062.01                | 44.23%         | 2181.47                | 28.81%        |
| Human Habitation    | 1.00                   | 0.01%          | 0.00                   | 0.00%          | 0.98                   | 0.01%         |
| Industrial Land     | 0.37                   | 0.00%          | 0.00                   | 0.00%          | 0.11                   | 0.00%         |
| Lake                | 13.62                  | 0.17%          | 0.00                   | 0.00%          | 1.02                   | 0.01%         |
| Marsh Land          | 5.77                   | 0.07%          | 0.00                   | 0.00%          | 0.00                   | 0.00%         |
| River               | 39.59                  | 0.49%          | 14.16                  | 0.30%          | 37.88                  | 0.50%         |
| Transportation Land | 2.89                   | 0.04%          | 0                      | 0.00%          | 0                      | 0.00%         |

**Table 2.** Landscape pattern indices of the study area.

|                 | <b>TA</b>    | <b>NP</b>  | <b>PD</b>       | <b>LPI</b>      | <b>TE</b>   | <b>ED</b>    | <b>LSI</b>  | <b>CONTAG</b> |
|-----------------|--------------|------------|-----------------|-----------------|-------------|--------------|-------------|---------------|
| <b>Shiqu</b>    | 1800824      | 22492      | 1.25            | 82.39           | 38454870    | 21.35        | 73.64       | 85.28         |
|                 | <b>PLADJ</b> | <b>LJI</b> | <b>COHESION</b> | <b>DIVISION</b> | <b>MESH</b> | <b>SPLIT</b> | <b>SHDI</b> | <b>AI</b>     |
|                 | 96.75        | 36.98      | 99.96           | 0.32            | 1223736.26  | 1.47         | 0.56        | 96.79         |
| <b>Dege</b>     | <b>TA</b>    | <b>NP</b>  | <b>PD</b>       | <b>LPI</b>      | <b>TE</b>   | <b>ED</b>    | <b>LSI</b>  | <b>CONTAG</b> |
|                 | 644263       | 17027      | 2.64            | 71.40           | 24016890    | 37.28        | 76.85       | 77.48         |
|                 | <b>PLADJ</b> | <b>LJI</b> | <b>COHESION</b> | <b>DIVISION</b> | <b>MESH</b> | <b>SPLIT</b> | <b>SHDI</b> | <b>AI</b>     |
|                 | 94.33        | 41.11      | 99.91           | 0.49            | 328937.41   | 1.96         | 0.84        | 94.40         |
| <b>Ganzi</b>    | <b>TA</b>    | <b>NP</b>  | <b>PD</b>       | <b>LPI</b>      | <b>TE</b>   | <b>ED</b>    | <b>LSI</b>  | <b>CONTAG</b> |
|                 | 733726       | 19702      | 2.69            | 62.68           | 25446540    | 34.68        | 77.08       | 78.44         |
|                 | <b>PLADJ</b> | <b>LJI</b> | <b>COHESION</b> | <b>DIVISION</b> | <b>MESH</b> | <b>SPLIT</b> | <b>SHDI</b> | <b>AI</b>     |
|                 | 94.70        | 42.94      | 99.89           | 0.59            | 298410.58   | 2.46         | 0.80        | 94.76         |
| <b>Xinglong</b> | <b>TA</b>    | <b>NP</b>  | <b>PD</b>       | <b>LPI</b>      | <b>TE</b>   | <b>ED</b>    | <b>LSI</b>  | <b>CONTAG</b> |
|                 | 800609       | 32222      | 4.02            | 21.15           | 42916860    | 53.61        | 121.78      | 70.40         |
|                 | <b>PLADJ</b> | <b>LJI</b> | <b>COHESION</b> | <b>DIVISION</b> | <b>MESH</b> | <b>SPLIT</b> | <b>SHDI</b> | <b>AI</b>     |
|                 | 91.90        | 35.34      | 99.81           | 0.90            | 79176.66    | 10.11        | 1.09        | 91.96         |
| <b>Litang</b>   | <b>TA</b>    | <b>NP</b>  | <b>PD</b>       | <b>LPI</b>      | <b>TE</b>   | <b>ED</b>    | <b>LSI</b>  | <b>CONTAG</b> |
|                 | 466235       | 16748      | 3.59            | 31.13           | 21566220    | 46.26        | 82.39       | 65.07         |
|                 | <b>PLADJ</b> | <b>LJI</b> | <b>COHESION</b> | <b>DIVISION</b> | <b>MESH</b> | <b>SPLIT</b> | <b>SHDI</b> | <b>AI</b>     |
|                 | 92.91        | 46.34      | 99.77           | 0.85            | 69570.70    | 6.70         | 0.96        | 92.98         |
| <b>Yajiang</b>  | <b>TA</b>    | <b>NP</b>  | <b>PD</b>       | <b>LPI</b>      | <b>TE</b>   | <b>ED</b>    | <b>LSI</b>  | <b>CONTAG</b> |
|                 | 757294       | 24862      | 3.28            | 58.83           | 28723440    | 37.93        | 85.03       | 73.96         |
|                 | <b>PLADJ</b> | <b>LJI</b> | <b>COHESION</b> | <b>DIVISION</b> | <b>MESH</b> | <b>SPLIT</b> | <b>SHDI</b> | <b>AI</b>     |
|                 | 94.22        | 37.34      | 99.89           | 0.64            | 270170.13   | 2.80         | 0.89        | 94.28         |



**Table 3.** The HCA clusters with  $r^2$  greater than 0.9

| No. | Clusters of Indices                                                                                                                                   |
|-----|-------------------------------------------------------------------------------------------------------------------------------------------------------|
| 1   | Al, Fe, Ni, Cu, Zn, Pb                                                                                                                                |
| 2   | TA, Marsh Land, Marsh Land Percentage, River                                                                                                          |
| 3   | PD, LPI, ED, PLADJ, COHESION, DIVISION, SHDI, AI                                                                                                      |
| 4   | LSI, SPLIT                                                                                                                                            |
| 5   | MESH, Grassland, Transportation Land                                                                                                                  |
| 6   | Farm Land, Farm Land Percentage                                                                                                                       |
| 7   | Forest, Forest Percentage, Grassland Percentage                                                                                                       |
| 8   | Human Habitation, Human Habitation Percentage                                                                                                         |
| 9   | Transportation Land Percentage, Per Capita GDP                                                                                                        |
| 10  | Accumulated Population, Accumulated Population Density, Accumulated GDP, Accumulated Per Capita GDP,<br>Accumulated Gross Output Value of Agriculture |

**Table 4.** Stepwise regression models of heavy metal elements, landscape pattern and economic indices

| Indices    | Regression models                                                    | $R^2$ | $F$     | Sig. |
|------------|----------------------------------------------------------------------|-------|---------|------|
| Al         | $Al = -64.629 + 0.039APCGDP$                                         | 0.875 | 195.26  | 0.00 |
| Fe         | $Fe = 36.489 + 0.072APCGDP - 6941.699HumanhabP$                      | 0.875 | 102.174 | 0.00 |
| Ni         | $Ni = 0.707 + 0.000138 APCGDP - 15.078 HumanhabP$                    | 0.863 | 85.086  | 0.00 |
| Cu         | $Cu = 1.238 + 0.083ForestP$                                          | 0.776 | 97.105  | 0.00 |
| Zn         | $Zn = 11.841 + 0.212 ForestP - 40.671TransportP$                     | 0.907 | 132.296 | 0.00 |
| Pb         | $Pb = 0.4 + 0.155ForestP - 0.001Forest$                              | 0.873 | 92.864  | 0.00 |
| TA         | $TA = 545952.613 + 2674.105Marsh - 438341.759MarshP + 5935.679River$ | 0.985 | 586.115 | 0.00 |
| MESH       | $MESH = 42505.135 + 34904.903Transport$                              | 0.922 | 329.144 | 0.00 |
| TransportP | $TransportP = 0.328 - 2.22 \times 10^{-5}PCGDP$                      | 0.961 | 695.189 | 0.00 |

$R^2$ , the coefficient of determination; APCGDP, accumulated per capita GDP; HumanhabP, human habitation percentage; ForestP, forest percentage; TransportP, transportation land percentage; Forest, area of forest; Marsh, area of marsh land; MarshP, marsh land percentage; River, area of river; Transport, area of transportation land; TransportP, transportation land percentage; PCGDP, per capita GDP.
